1 **Title**

2 Protein profiling reveals the characteristic changes of complement cascade pathway in  
3 the tissues of gastric signet ring cell carcinoma

4

5 **Authors and affiliations**

6 Yang Fan<sup>123</sup>, Bin Bai<sup>4</sup>, Yan Ren<sup>3</sup>, Yanxia Liu<sup>12</sup>, Fenli Zhou<sup>4</sup>, Xiaomin Lou<sup>1</sup>, Jin Zi<sup>3</sup>,  
7 Guixue Hou<sup>3</sup>, Qingchuan Zhao<sup>4\*</sup>, Siqi Liu<sup>123\*</sup>

8

9 <sup>1</sup>CAS Key Laboratory of Genome Sciences and Information, Beijing Institute of  
10 Genomics, Chinese Academy of Sciences, No 1, Beichen West Road, Beijing 100101,  
11 China

12 <sup>2</sup>University of the Chinese Academy of Sciences, Beijing 100049, China

13 <sup>3</sup>Clinical Laboratory of BGI Health, BGI-Shenzhen, Shenzhen 518083, China

14 <sup>4</sup>State Key Laboratory of Cancer Biology, Xijing Hospital of Digestive Diseases, Fourth  
15 Military Medical University, Xi'an 710032, China

16

17 \*To whom correspondence should be addressed

18

19 **Running title**

20 Proteomics of gastric SRCC

21

22 **Keywords**

23 gastric cancer, signet ring cell carcinoma, data independent acquisition mass  
24 spectrometry, proteomics, complement cascade

25

26 **Additional information**

27 Corresponding author:

28 Siqi Liu

29 BGI-Shenzhen

30 Beishan Industrial Zone, Yantian District, Shenzhen 518083, China

31 [siqiliu@genomics.cn](mailto:siqiliu@genomics.cn)

32 Conflict of interest:

33 The authors declare no potential conflicts of interest.

34 Word count: 4,918

35 Number of table: 1

36 Number of figures: 7

37

38 **Abstract**

39

40 Signet ring cell carcinoma (SRCC) is a histological subtype of gastric cancer that has  
41 distinct features in cellular morphology, epidemiology and clinicopathology compared  
42 with adenocarcinomas (ACs). Lacking of systematically molecular overview to this  
43 disease made a slow progress in diagnosis and therapy for SRCC. In the present  
44 proteomics study, the gastric tissues were collected from tumor and adjacent regions  
45 including 14 SRCC and 34 AC cases, and laser capture microdissection (LCM) was  
46 employed to eradicate cellular heterogeneity of the tissues. Over 6,000 proteins were  
47 quantified through data independent acquisition (DIA) mass spectrometry (MS). The  
48 quantitative profiles of proteomes in tumor tissues, either AC or SRCC, were  
49 dramatically different from that in the corresponding adjacencies, whereas the SRCC  
50 proteomes appeared not distinguishable to the AC proteomes via hierarchical clustering.  
51 However, focusing on univariate analysis and pathway enrichment unrevealed that  
52 some proteins and pathways bared the differences between SRCC and ACs. Importantly,  
53 the abundance changes for a bulk of proteins involved in complement cascade were  
54 highly associated with SRCC but not so sensitive to the AC status. A hypothesis,  
55 therefore, was proposed that the complement cascade was evoked in the SRCC  
56 microenvironment upon infiltration, while the SRCC cells survived from the  
57 complement cytotoxicity by secreting negative regulators. Moreover, an attempt was  
58 made to seek appropriate cell model for gastric SRCC, through proteomic comparison  
59 of the 15 gastric cell lines and the gastric tumors. The prediction upon supervised  
60 classifier suggested none of these gastric cell lines qualified in mimic to SRCC.

61

## 62 Introduction

63

64 Gastric signet ring cell carcinoma (SRCC) is a histological subtype of gastric cancer  
65 defined by World Health Organization (WHO) as gastric tumors composed of  
66 predominantly or exclusively of signet-ring cells, which are characterized by a central  
67 optically clear, globoid droplet of cytoplasmic mucin with an eccentrically placed  
68 nucleus<sup>1</sup>. On the contrary to a trend of decreasing incidence of gastric cancer worldwide,  
69 the SRCC incidence has remained rising<sup>2</sup>. The molecular features of pathology and  
70 pharmacology relevant to SRCC are highly attractive in the frontier of gastric cancer  
71 study.

72

73 Gastric SRCC is not only special in its histology, but is also very different in  
74 clinicopathological features from other subtypes of gastric cancer. The female incidence  
75 of SRCC in all the gastric cancer is approximately 50%, whereas that of non-SRCC is  
76 about 30%; the average incidence age of SRCC is around 62 years, whereas that of non-  
77 SRCC is roughly 69 years<sup>3</sup>. Although *Helicobacter pylori* infection is regarded as a risk  
78 factor to gastric cancer, this bacterium is not commonly found in SRCC<sup>4</sup>. With  
79 comparison of SRCC to other two main subtypes of gastric cancer, well-moderately  
80 differentiated adenocarcinoma (WMDAC) and poorly differentiated adenocarcinoma  
81 (PDAC), Chon et al observed that at early stage the prognosis of SRCC was better than  
82 that of WMDAC and PDAC, whereas at later stage the SRCC prognosis was worse than  
83 other two subtypes<sup>5</sup>.

84

85 During the last decade, a number of studies dug the molecular indicators of gastric  
86 SRCC. Immunostaining revealed that all of gastric SRCC and mucinous  
87 adenocarcinoma with high abundance of trafficking kinesin protein 1<sup>6</sup>. The RT-PCR  
88 and IHC evidence demonstrated that the expression product of forkhead box P3 was  
89 significant upregulated in gastric cancer, especially the correspondent abundance with  
90 higher percentage in SRCC than in adenocarcinoma (79.3% versus 0%)<sup>7</sup>. Similar to the  
91 observations, several proteins such as pyruvate kinase M1/2, glypican-3, cathepsin E,  
92 and transmembrane protein 207 were found in abundance changes in the gastric SRCC  
93 cells or tissues. These studies touching the SRCC-related proteins are still at  
94 preliminary phase and are far from clinical practice. Most those proteins were  
95 individually divulged through different approaches and laboratories, and were not  
96 commonly verified. Proteomics as a powerful means in identification and quantification  
97 of proteins has naturally become a main technique for exploration of the SRCC-related  
98 proteins.

99 Proteomic investigation on gastric SRCC is still limited within a slow pace. There are  
100 only 3 published papers so far that discussed about SRCC using proteomics but did not  
101 reach any significant conclusion to help understanding of the molecular features of  
102 SRCC<sup>8-10</sup>. Which barrier did hinder the relevant studies to gastric SRCC? Three factors  
103 at least, according to our view, indeed affect the SRCC study. First of all, how to obtain

104 a reasonable cohort of the SRCC samples is an obvious limit in this area. All the studies  
105 in the published literatures regarding the SRCC proteomics were only dealt with less  
106 than 4 cases and were less convincing for statistical evaluation. Secondly, how to excise  
107 the SRCC tissues is a key limit in the sample preparation. Since gastric SRCC owns its  
108 special histological features, the gastric tissues with dominant signet ring cells should  
109 be carefully estimated and isolated. Thirdly, how to conduct proteomic analysis is an  
110 important technique issue so that it provides a deep and large data in proteomic  
111 comparison, especially in a relatively large cohort.

112

113 With awareness of the 3 gaps, we presented in this communication, a comprehensive  
114 comparison of the proteomes derived from the gastric tissues of SRCC, PDAC and  
115 WMDAC. A cohort with 48 cases including 14 SRCC, 17 PDAC and 17 WMDAC  
116 cases was strictly selected from more than 2,500 cases and were carefully evaluated on  
117 the basis of histological examination. The cancer and adjacent tissues were well isolated  
118 using laser capture microdissection (LCM)<sup>11</sup>. We employed data independent  
119 acquisition (DIA)-based proteomics<sup>12</sup> in quantitatively profiling proteomes for all the  
120 individuals at large scale. For the first time, the quantitative proteomes in gastric SRCC,  
121 PDAC and WMDAC were deeply characterized in parallel, revealing the proteins in  
122 the complement cascade pathway significantly upregulated in SRCC. Moreover, we  
123 made a proteomic survey to 14 gastric cancer cell lines aiming at classifying the cancer  
124 subtype-representativeness of each cell line.

125

126 **Methods**

127

128 Detailed methods are presented in **Supplemental information 1**. In summary, frozen  
129 tissues of 3 subtypes of gastric cancer, SRCC, PDAC and WMDAC, were retrieved  
130 from Xijing Hospital, China, following the inclusion criteria described in **Figure 1**.  
131 Tumor cells and corresponding adjacent epithelial cells were isolated from tissue  
132 samples by LCM, while fifteen gastric cell lines were also collected from other  
133 laboratories and commercial sources (**Table S1**). The LCM samples and cell line  
134 samples were analyzed by DIA MS. The criteria in **Figure S2** were set to filter the data  
135 and identify tumor/adjacent differentially expressed proteins (T/A-DEPs). Statistical  
136 evaluation and protein fold changes were used to determine SRCC/AC DEPs (S/A-  
137 DEPs). Biologically relevant pathways were extracted by enrichment analysis. Machine  
138 learning based models were trained and used to predict tissue representativeness of  
139 gastric cell lines. All the MS data were deposited to the Chinese National GeneBank  
140 Sequence Archive (CNSA) database (<https://db.cngb.org/cnsa/>) (CNP0000652).

141

## 142 Results

143

### 144 Collection of high-quality cancer tissues and proteomic data

145

146 Of 80 SRCC cases recorded in the tissue bank of Xijing hospital, only 14 tumor tissues  
147 were qualified with major tumor cells with characters of signet ring type by H&E  
148 staining recheck (**Figure 1**). In the tissue bank, 2442 cases were primarily diagnosed as  
149 PDAC and WMDAC, 685 cases were removed after recheck, resulting in 1,334 PDAC  
150 and 503 WMDAC cases. For each subtype, 14 cases were selected in a case-wise  
151 matching manner regarding the 14 SRCC cases. Then 3 low-age cases with available  
152 frozen tissues and > 50% cancer cells for each subtype were supplemented, resulting in  
153 inclusion of 17 cases for PDAC and WMDAC. In total of 48 cases of gastric cancer  
154 that were well collected paired tissues of tumor and adjacent, these samples were  
155 histologically classified into SRCC (n = 14), PDAC (n = 17) and WMDAC (n = 17). In  
156 order to set a base for cross-subtype comparison, the matching of clinicopathological  
157 features were specially considered in the selected cases. As a result, the age, gender, T  
158 and N staging of SRCC case were not significantly different from those of PDAC or  
159 WMDAC cases (**Table 1**). Of the 3 subtypes, the mean ages ranged from 54.79 to 58.35  
160 years, the percentages of male cases ranged from 64% to 71%, the tumors were all in  
161 advanced stages, i.e. the T2, T3 and T4 stages, and the percentages of cases in their N0,  
162 N1/N2 and N3 stages ranged from 0% to 7%, 21% to 35% and 59% to 71%.

163

164 Tumor cells are generally in uneven distribution in a resected tumor tissue. To obtain  
165 the tissues with high contents of tumor cells, we adopted LCM and collected the tissues  
166 with low intra-tumor heterogeneity for protein extraction. The typical microscopic  
167 images of the LCM treated tissues were presented in **Figure 2A**, 3 cases randomly  
168 selected from each subtype of gastric cancer, clearly demonstrating the “signet ring”  
169 morphology of SRCC, the densely formation of separate tumor cells of PDAC as well  
170 as the gland-like structures formed by WMDAC cells.

171

172 The LCM samples with approximate area of 20 mm<sup>2</sup> were processed through an  
173 established method in our laboratory that was suitable for extracting peptides from  
174 micro amount biological samples (**Methods**). A range of 1.4 to 12.5 μg peptides were  
175 retrieved from an LCM sample, and the peptide yields were ranged from 0.14 to 0.65  
176 μg/mm<sup>2</sup> LCM sample (**Table S3**).

177

178 For the sake of better protein identification, we employed Preview to rapidly interrogate  
179 the occurrences of 25 chemical modifications in the samples. The assessment results in  
180 **Table S2** surprisingly suggested that carbamidomethylation artifacts (+57 on N-  
181 terminus, H and K), deamidation (+1 on N and Q) and DTT addition (+152 on C) were  
182 top 3 modifications, while pyroglutamate formation (-17 on N-terminal Q) and  
183 oxidation (+16 on M), were ranked at the 6<sup>th</sup> and 7<sup>th</sup> places. Therefore, the top 3

184 modifications were set as variable modifications in subsequent database searching. The  
185 spectra library required by DIA analysis was constructed by merging the DDA search  
186 results from the samples that were treated with pooling and fractionation, and the  
187 publicly available pan human library<sup>13</sup>. The library covered 10,990 proteins, 163,254  
188 peptides and 299,808 precursors, correspondingly.

189

190 For quality control of proteomic data, we checked for potential batch effect by feeding  
191 the unprocessed quantification data to principal component analysis (PCA). As  
192 visualized in **Figure S4**, no obvious deviation was found among the 4 sequential  
193 batches, which were gained from the continuous runs lasting a month. This implicated  
194 that the data quality was solid and batch effect could be ruled out. For protein  
195 identification and quantification, DIA analysis against the library generated a  
196 quantitative proteome containing 6,195 proteins (**Table S4**) from these tissues in total,  
197 averagely 4,835 proteins per sample (**Figure 2B**). Among all the quantified proteins,  
198 62% were based on 3 unique peptides, while the default maximum unique peptides used  
199 for protein quantification in Spectronaut are just set at 3 (**Figure 2C**). These data made  
200 a solid base for further qualitative and quantitative analysis.

201

## 202 **Proteomics characteristics of gastric cancers**

203

204 To get a glimpse of the overall pattern from all the samples, the filtration of proteomic  
205 data was conducted through criteria described in **Methods**, and were resulted in 4,945  
206 proteins (**Table S4**). These protein abundances in the individual samples were  
207 compressed to 96 two-dimensional data points via t-SNE and visualized by scatter plot  
208 (**Figure 3A**). The figure revealed that the t-SNE derived distances seemed not to  
209 distinguish different subtypes of gastric cancer according to the overall protein  
210 abundance patterns, meanwhile, tumors and adjacent tissues presented clearly different  
211 patterns in protein abundance.

212

213 Based on the criteria and cutoffs described in **Methods**, we were able to identify the  
214 T/A-DEPs, 574/263, 530/235 and 468/213 (down-regulated/up-regulated) from SRCC,  
215 PDAC and WMDAC, respectively (**Figure 3B** and **Table S4**). The overlap status of  
216 T/A-DEPs were assessed in **Figure S5**, showing 30.9% (380) T/A-DEPs shared by the  
217 3 subtypes. In query of the functions related to the 380 common T/A-DEPs, pathway  
218 enrichment analysis was performed using the Reactome pathway database (**Figure 3C**  
219 and **D**, **Table S5**). On the bases of evaluation by FDR-adjusted p values produced by  
220 the Fisher's exact tests, extracellular matrix (ECM) organization, collagen biosynthesis  
221 and modifying enzymes as well as collagen formation were the top 3 pathways that  
222 were commonly upregulated in all the subtypes. As for the enriched pathways with the  
223 down-regulated T/A-DEPs, TCA cycle, respiratory electron transport and metabolism  
224 were the 3 most pronounced ones. It was a common phenomenon that activation of  
225 ECM modification and suppression of aerobic metabolism were well recognized

226 hallmark behaviors of many tumors<sup>14, 15</sup>. This result implied that gastric cancers had  
227 major and common differences between their tumors and adjacent tissues which pointed  
228 to disruptions of ECM and energy metabolism.

229

### 230 **Comparison of the proteomic characteristics among SRCC and ACs**

231

232 We further inquired to whether there was any subtype-based abundance feature. In an  
233 attempt to hierarchically cluster the 48 cases based on their tumor/adjacent protein  
234 ratios (**Figure S6**), it was not easy to distinguish individual subtypes from each other.  
235 Then the protein abundances were compared in linear regression and the closeness was  
236 evaluated by Pearson correlation coefficient ( $R^2$ ). As shown in **Figure 4A**, PDAC and  
237 WMDAC were mutually more similar in protein fold change pattern,  $R^2 = 0.79$ , as  
238 compared with PDAC to SRCC,  $R^2 = 0.70$ , and WMDAC to SRCC,  $R^2 = 0.66$ , implying  
239 that the proteomic abundance of PDAC and WMDAC was generally comparable,  
240 whereas that of SRCC was unique to some extent. Based on this overview, more  
241 investigations were conducted to pinpoint the proteins as well as pathways with  
242 different expression patterns between SRCC and ACs.

243

244 According to the definition of S/A-DEP, of 4,133 candidate proteins, only 10 proteins  
245 matched with the criteria (**Table S6**), 6 proteins with higher abundances in SRCC,  
246 carcinoembryonic antigen-related cell adhesion molecule 5, matrix Gla protein, mucin-  
247 2, mucin-5B, ribosomal RNA processing protein 1 homolog B and serpin B6, while 4  
248 proteins with higher abundances in AC, cytochrome c oxidase assembly protein COX11,  
249 mitochondrial 28S ribosomal protein S11, mitochondrial peptidyl-tRNA hydrolase 2  
250 and selenoprotein H (**Figure S7**). In order to find pathways whose regulations were  
251 different among subtypes, we carried out pathway enrichment on T/A-DEPs identified  
252 from 3 subtypes (**Table S7**). The  $\log_{10}$  FDR-adjusted p values of the top enriching  
253 pathways were normalized and plotted to ternary scale (**Figure 4B**), demonstrating that  
254 the complement cascade and its regulation pathway were specifically upregulated in  
255 SRCC. Furthermore, GSEA was used to mine pathways harbored proteomic signals  
256 distinguishing SRCC from AC (**Table S7**). The top AC-specific pathways were mostly  
257 mitochondrial functions related. While SRCC-specific pathways were majorly related  
258 to extracellular reactions including the complement cascade (**Figure 4C and D**), which  
259 agreed with previous analysis. The complement cascade involves 138 proteins  
260 according to the Reactome database, of which approximately 60% (78) were quantified  
261 in the gastric tissues (**Figure 5**). As over one third of the gastric complement proteins  
262 exhibited higher abundance in SRCC and the average abundance ratios of T/A for  
263 complement proteins were 2 folds more than that in PDAC and WMDAC (**Figure S8**),  
264 we came to a deduction that the proteins involved in complement cascade were largely  
265 regulated in the SRCC microenvironment, while such observation in the study of gastric  
266 cancer was not reported yet. To conclude, despite the overall similar pattern observed  
267 among the 3 subtypes, handful proteins were found to express differentially between



268 SRCC and ACs. Meanwhile, pathway enrichment results consolidated that complement  
269 cascade was much more upregulated in SRCC than AC.

270

### 271 **The complement relevant proteome events in SRCC**

272

273 The complement cascade is harbored in human innate immunity, which likely consists  
274 of two events in cancer, complement activation followed by consensus amplification in  
275 tumor microenvironment and complemental regulation proteins (CRPs) function in  
276 membrane bound or secreted forms in tumor cells. The complement activation  
277 generally takes three distinct pathways, namely classical, lectin and alternative, while  
278 all the activated pathways finally merge into consensus amplification to exert the  
279 cascaded influence of innate immunity. As shown in **Figure 5**, the bulk of proteins in  
280 classical and lectin pathway were identified in SRCC with significant upregulation but  
281 not in AC tissues, except FCN3, whereas only two proteins of alternative pathways  
282 were perceived in all the tissues of SRCC and ACs with insignificant changes of their  
283 protein abundance. Moreover, a large amount of immunoglobins that might recognize  
284 the tumor-specific antigens and bind to C1 complexes in classical pathway were  
285 identified with increased abundance (**Table S4**), implying the activation of classic  
286 pathway in SRCC. Mucins (MUC2 and MUC5B) that are the secreted glycoproteins  
287 with rich N-acetylglucosamine moiety<sup>16</sup> and are liganded with lectins<sup>17, 18</sup> detected in  
288 high abundance were significantly upregulated in SRCC as compared that in ACs,  
289 implicating that lectin pathway was indeed activated in SRCC (**Figure 5**). In consensus  
290 amplification, complement proteins were upregulated to higher extent in SRCC than  
291 ACs, whereas the protein fold changes in the pathway appeared less than that in  
292 classical and lectin activation (averagely 5.00 fold increase in classical, 8.32 in lectin  
293 and 3.51in consensus). All the proteomic evidence thus led to a deduction that the  
294 classical and lectin pathways but not alternative pathway were activated in SRCC. The  
295 activation signals should be enlarged through consensus amplification, however the  
296 changes of protein abundance in consensus pathway were not fully coordinated with  
297 the complement activation. This suggested that the delivery of the activation signals  
298 were possibly attenuated in SRCC.

299

300 Tumor derived CRPs identified in this study, either membrane bound or secreted,  
301 generally function as negative regulators to block the complement cascade. As depicted  
302 in **Figure 5**, many CRPs exhibited higher abundance in the SRCC tissues. These  
303 upregulated CRPs exhibited two characterizations. First, membrane cofactor protein  
304 (CD46), complement decay-accelerating factor (DAF, CD55) and CD59 are the  
305 common membrane bound CRPs related with tumor to inhibit complement cascade.  
306 Although the three proteins were identified in the gastric tissues, only CD55 was found  
307 abundance increased in SRCC, but not the others. Second, over 10 secreted CRPs were  
308 identified with abundance augment in SRCC. For instance, there were C4b-binding  
309 protein (C4bp) and complement factor I that bind or cleave C3/C5 convertases<sup>19, 20</sup>,

310 complement factor H and its related proteins (FHRs) that target and degrade C5  
311 convertase<sup>21</sup> and carboxypeptidase N and clusterin that inactivate the membrane attach  
312 complex (MAC)<sup>22, 23</sup>. Importantly, these secreted CRPs showed significant higher  
313 abundance in SRCC against the corresponding adjacent tissues, while their fold changes  
314 in SRCC were obviously larger than that in ACs, C4bp (6.75/3.95), DAF (9.28/4.22),  
315 factor I (4.39/1.41), clusterin (2.87/1.42) and carboxypeptidases N (6.03/4.22),  
316 respectively. Hence, the proteomics evidence supported the postulation that the secreted  
317 CRPs in the tumor cells of SRCC were greatly expressed and secreted to matrix, which  
318 might mainly response to complement activation in cancer microenvironment and  
319 effectively attenuate the pathway of complement consensus amplification.

320

321 A question is naturally raised how the complement activation coordinates with  
322 complement regulation because of both events with the enhanced abundance of the  
323 involvement proteins. We hypothesize a molecular scenario that in tumor  
324 microenvironment the complement activation, like classic and lectin, are triggered by  
325 degradation products of phagocytosis, chemotaxis of inflammatory cells or tumor cell  
326 lysis. Once the complement activation components are deposited on tumor cell surface,  
327 the defense systems within them would be stimulated to exhibit complement-avoidance,  
328 by either DAF or a set of the secreted CRPs. Therefore, in SRCC tissues a balance  
329 between complement activation and regulation is remained so that some tumor cells  
330 escape from complement mediated cytotoxicity (**Figure 6**).

331

### 332 **Comparison of the proteomic characteristics between gastric cancer tissues and** 333 **cell lines**

334

335 Many cell lines derived from the tissues of gastric cancer are widely accepted in  
336 academic investigation. After cell proliferation in many generations and the special  
337 treatment of cell immortalization, a question has remained whether those cell lines still  
338 keep the molecular characteristics of gastric cancer. In this study we tried to seek the  
339 answer through comparison of proteomic characteristics between tissues and cell lines.  
340 A total of 6,639 proteins were quantified (**Table S8 and Figure S9B**) from all the cell  
341 lines, and on average 5,213 proteins were perceived in an individual cell line (**Figure**  
342 **S9A**). The globally normalized protein abundance data were hierarchically clustered  
343 with an unsupervised mode as shown in **Figure 7A**, demonstrating no obvious  
344 hierarchical cluster because over 50% of the proteins had relatively comparable  
345 abundance, whereas the other proteins possessed diverse distribution of their abundance.

346

347 The comparability assessment towards proteomic data was carried out in both  
348 qualitative and quantitative information. For qualitative comparison, Jacard index<sup>24</sup> was  
349 gained by the ratio of the overlapped proteins to the total proteins in any two samples,  
350 and resulted in a Jacard matrix. As illustrated in **Figure 7B**, the Jacard index mean (0.64)  
351 for proteins between tissue and cell samples were much less than the values of 0.82 or

352 0.82 for the proteins within tissues or within cell lines, suggesting that the overall  
353 features in the tissue proteome was incomparable with that in cell lines. There were  
354 1,409 proteins uniquely identified in cell lines and 965 uniquely in tissues (**Figure**  
355 **S10A**). Through the pathway enrichment analysis, the unique proteins in cell lines were  
356 significantly concentrated in 86 Reactome pathways and those in tissues were enriched  
357 into 53 Reactome pathways (**Table S9**), whereas the converged pathways in tissues  
358 were completed different from cell lines, strongly endorsing the conclusion drawn from  
359 **Figure 7B** and **Figure S10B**. For quantitative comparison, a correlation matrix of  
360 protein abundance (**Figure 7C**) was generated from correlation coefficients ( $R^2$ ) of the  
361 co-identified proteins between tissues and cell lines. Similar to the results of Jacard  
362 matrix, the mean  $R^2$  of 0.57 between tissues and cell lines was obviously smaller than  
363 the mean  $R^2$  within tissues (0.81) or cell lines (0.80), implying the quantification  
364 distribution of proteomes was largely different between tissues and cell lines.

365

366 Machine learning classifiers are efficient means to find out similar or dissimilar groups  
367 in large data. Among a variety of algorithms, random forest<sup>25</sup> classifier is able to smartly  
368 weight and combine the intrinsic input features, thus generalizing reasonable  
369 predictions. There were 3 random forest classifiers that were constructed, 1) NT  
370 classifier was trained on data from all the 96 LCM samples to classify a cell line into  
371 “normal” or “tumor”, 2) AS classifier was trained on data from 48 tumor LCM samples  
372 to classify a cell line into “SRCC” or “AC” and 3) PW classifier was trained on data  
373 from 34 adenocarcinoma LCM samples to classify a cell line into “PDAC” or  
374 “WMDAC”. Cross validations were carried out to find that all 3 classifiers yield  
375 acceptable accuracy with the whole dataset (**Figure S11A and B, Table S10**).  
376 Probability of 50% was set as the threshold for class prediction. As a result, all the cell  
377 lines of gastric cancer selected were classified to “tumor” with probabilities of 62%~73%  
378 by the NT classifier (**Figure 7E**), and 3 best representatives for tumor were MKN-28,  
379 BGC-823 and MKN-1 with probabilities over 71%. Although the GES-1 cell line  
380 derived normal gastric epithelia, it was also classified into “tumor” due to its predicted  
381 probability was 62%, GES-1 had the lowest probabilities to be “tumor” in all the cell  
382 lines, implying that it was still different from tumor tissue somehow. All the cell lines  
383 were classified to “adenocarcinoma” with probabilities of 63%~71% by the AS  
384 classifier with the top 3 representatives of AC, NCI-N87, GCSR-1 and BGC-823  
385 (**Figure 7F**). Surprisingly, 3 cell lines derived from SRCC tumors, KATO-3, GCSR-1  
386 and SNU-668 (**Table S1**) were also recognized as AC. As for PW, the prediction  
387 probabilities generated by this classifier were ranged from 48%~58% (**Figure 7G**),  
388 which were too close to 50% to reach an acceptable predictions, suggesting that the cell  
389 lines for PDAC or WMDAC were not well grouped through PW classifier. Based upon  
390 these classifiers, we came a conclusion that the 14 selected cell lines of gastric cancer  
391 appeared similar proteomic features with the AC in tissues, nevertheless the cells  
392 currently used for SRCC study were incomparable with the correspondent tumor tissues  
393 based upon proteomic features at least.

## 394 Discussion

395

396 Previously, in term of the depth, the best result obtained from MS based proteomics on  
397 gastric cancer was reported by Ge et al<sup>26</sup>, who managed to quantify ~4,400 proteins per  
398 sample on average and ~9,200 proteins for a total of 168 samples. This was done by  
399 feeding large amount of peptide samples and fractions (~100 µg in 6 fractions) to LC-  
400 MS/MS with DDA. In comparison, we applied DIA strategy in this study to quantify  
401 ~4,800 proteins per sample on average and ~6,100 proteins for a total of 96 samples,  
402 achieving slightly better quantification results per sample yet but much improved inter  
403 sample comparability. We noticed that, in spite of the similar scale and depth achieved  
404 by the present work and Ge's work, there are differences in the DEPs-enriching  
405 pathways concluded by the two works. To investigate, we compared the pathways  
406 enriching DEPs from the 3 histological subtypes in our work and 3 molecular subtypes,  
407 PX1, PX2 and PX3 classified by Ge et al. As listed in **Table S11**, the upregulated  
408 pathways of 3 subtypes in our work were mainly ECM related, and the downregulated  
409 pathways were mainly energy metabolism related. In contrast, the PX1 subtype didn't  
410 clearly imply its downregulated pathway, meanwhile the PX2 and PX3 showed the  
411 downregulation pathways related with energy metabolism and translation, respectively.  
412 As for the upregulated pathways, the PX1 and PX2 concentrated in transcription and  
413 cell cycle related functions, while the PX3 exhibited enrichment of immune systems  
414 related pathways. The inter study differences in DEPs and their enriching pathways  
415 could be attributed to two factors, 1) different schemes of subtype classifications  
416 adopted by the two works may highlight different functional aspects for each subtypes  
417 and 2) LCM used our work reduced interfering signals from other types of cells present  
418 in tumors, while Ge's work made use of bulk tissues for the analysis. Nevertheless, it  
419 should be recognized that the results of both studies reflected only parts of the gastric  
420 cancers and further investigations featured with advanced scale and depth are needed  
421 to fully characterize the gastric cancer.

422

423 With an emphasis on the SRCC's unique characteristics in comparison to ACs, 10  
424 proteins were revealed to have distinct expression patterns between SRCC and ACs in  
425 this work. To examine whether these patterns were supported at transcription level, a  
426 transcriptomic gastric tumor dataset including 407 samples (32 normal tissues, 363 AC  
427 tumors and 12 SRCC tumors) generated in a TCGA project (TCGA-STAD,  
428 <https://portal.gdc.cancer.gov/projects/TCGA-STAD>) was retrieved. The mRNA  
429 abundances in FPKM were normalized and values for the 10 relevant genes were  
430 extracted, shown in **Figure S14**. Among them, CEACAM5, MUC2, MUC5B and  
431 MRPS11 had similar SRCC/AC differences in their transcripts and proteins, which  
432 made them solid SRCC specific indicators. Carcinoembryonic antigen-related cell  
433 adhesion molecules, encoded by CEACAM5 gene, had long been recognized as a tumor  
434 associated transmembrane protein. Its overexpression was observed in gastric and colon  
435 cancers<sup>27, 28</sup>. Besides its intercellular adhesive role played in various types of tissues<sup>29</sup>,

436 CEACAM5 also possess a series of tumor promoting functions such as disruption of  
437 cell polarization, inhibition of cellular differentiation and anoikis<sup>30-32</sup>. Biomarker study  
438 carried out by Zhou et al. associated CEACAM5 expression with worse prognosis of  
439 gastric cancer<sup>33</sup>. When it comes to SRCC, the presence of CEACAM5 was not  
440 consistent. Immune staining results demonstrated in Terada's study suggested  
441 CEACAM5 had higher level of expression in gastric and colorectal SRCC<sup>34</sup>, while  
442 Warner et al. reviewed 20 prostate SRCC cases only to find 4 CEACAM5 positive  
443 cases<sup>35</sup>. Nevertheless, as this study and independent TCGA dataset revealed that  
444 CEACAM5 was specifically highly expressed in gastric SRCC comparing to AC, there  
445 is a potential opportunity to develop unique therapy to SRCC by targeting CEACAM5  
446 whose protein product is located at tumor cell surface. In fact, such strategy was already  
447 conceptualized and experimented for colorectal cancer<sup>36</sup>. Mucin 2 and mucin 5B are 2  
448 mucus comprising proteins widely produced and secreted by epithelial goblet cells  
449 under physiological condition. One of the functions of mucin 2 is suppression of  
450 inflammation occurs at mucous epithelia, deficit of which was postulated to be a  
451 promoting factor of colon cancer<sup>37, 38</sup>. However, in the case of gastric SRCC, the  
452 overexpression of the secreted mucins doesn't necessarily contribute to positive effect,  
453 since a significant amount of mucins are stored in the intracellular droplets of signet  
454 ring cells, which potentially indicates a disruption of physiological secretion of mucins.  
455 Further examination of expression levels of the mucin secretion related proteins,  
456 including rab3 GTPase-activating protein, protein unc-13 homologs, protein unc-18  
457 homologs, syntaxins, synaptotagmins, synaptosomal-associated proteins and vesicle-  
458 associated membrane proteins<sup>39</sup> in our proteomics data, didn't support this postulation.  
459 The unique morphology of SRCC complicates the function of overexpressed mucins,  
460 and one can hope future investigations harness the complication in treating SRCC. The  
461 mitochondrial ribosomal small subunit 11, encoded by MRPS11, was shown to be  
462 expressed at a specifically lower level in SRCC in comparison to AC. The expression  
463 of MRPS11 was correlated with favored outcome in colorectal cancer<sup>40</sup>, but its  
464 functional association with cancer is yet to be discover.

465

466 As emphasized in the results, complement cascade and its regulation were found to be  
467 characteristically upregulated pathways (**Figure 6**). Concerning the cancer related  
468 complement cascade deregulation as reviewed by Afshar-Kharghan<sup>41</sup>, many previous  
469 studies has been carried out, covering glioblastoma, melanoma as well as cervical,  
470 ovarian, lung, colorectal, breast and thyroid bladder. The complement cascade carried  
471 out double-sided functions in development of various tumors. On the one hand, it  
472 promotes elimination of tumor cells by activating adaptive immune systems and  
473 forming MAC in microenvironment which directly induces apoptosis in tumor cells, on  
474 the other hand, the complement cascade promotes proliferation of tumor cells via  
475 anaphylatoxin signaling. For complement cascade in gastric cancers, very limited  
476 findings were available. Chen et al revealed that expression of complement proteins  
477 C5b, C6, C7, C8 and C9 was tumor-related and differentiating stage-dependent in

478 gastric adenocarcinoma<sup>42</sup>, while Inoue et al reported that a complement regulator, CD55  
479 was constantly expressed higher in gastric cancer cells than the normal gastric tissues<sup>43</sup>.  
480 Other complement cascade related proteins, C1r, C1s, C3 and the most central C4b, as  
481 well as multiple complement regulators lacked documentations until the present study.  
482 As regards complement-related proteins in gastric SRCC, only C1q was reported to be  
483 associated with the tumor development<sup>44</sup>. For the first time, our study discovered a bulk  
484 of the proteins in complement cascade pathways highly sensitive in SRCC tissues.  
485 Although the implications of complement cascade are incomplete and naive, its  
486 importance in host immune system has attracted studies related to a wide range of  
487 diseases. As pointed out by Kleczko et al<sup>45</sup>, therapies targeting complement cascade had  
488 already been experimented against immune system related diseases like rheumatoid  
489 arthritis and age-related macular degeneration. Judged by the quantitative proteomes  
490 profiled by the present study, it was assumed that the evading of complement induced  
491 cell death by up-tuning the complement negative regulators was an significant  
492 characteristic of SRCC, and targeting the CRPs might be an effective approach to  
493 inhibit SRCC.

494

495 Although we discovered the association of complement cascade activation to gastric  
496 SRCC in a subtype-constrained manner, it should be noted that the proteins involved in  
497 complement cascade were largely missing in any of the 14 gastric cancer cells. In fact,  
498 about 80% (61) of proteins in complement cascade in gastric tumor tissues were not  
499 reflected by any gastric cancer cell lines. This caveat needs to be aware when cell lines  
500 are used to model tumors, where molecular events occur in the tumor  
501 microenvironments such as complement cascade, are lost in cell lines.

502

503 **Acknowledgments**

504

505 This work was supported by the funding from the National Key R&D Program of  
506 China (2017YFC0908403) and the National Key Basic Research Program of China  
507 (973 program) (No. 2014CBA02002 and No. 2014CBA02005).

508

509 **References**

510

511 1 Bosman F, Carneiro F, Hruban R, Theise N. WHO classification of tumors of digestive  
512 system. WHO Press **2010**;

513 2 Bamboat ZM, Tang LH, Vinuela E, Kuk D, Gonen M, Shah MA, et al. Stage-stratified  
514 prognosis of signet ring cell histology in patients undergoing curative resection for  
515 gastric adenocarcinoma. *Ann Surg Oncol* **2014**;21:1678–85.

516 3 Kim DY, Park YK, Joo JK, Ryu SY, Kim YJ, Kim SK, et al. Clinicopathological  
517 characteristics of signet ring cell carcinoma of the stomach. *ANZ J Surg*  
518 **2004**;74:1060–4.

519 4 Yamamoto Y, Fujisaki J, Omae M, Hirasawa T, Igarashi M. Helicobacter pylori-  
520 negative gastric cancer: Characteristics and endoscopic findings. *Dig Endosc*  
521 **2015**;27:551–61.

522 5 Chon HJ, Hyung WJ, Kim C, Park S, Kim JH, Park CH, et al. Differential Prognostic  
523 Implications of Gastric Signet Ring Cell Carcinoma: Stage Adjusted Analysis  
524 from a Single High-volume Center in Asia. *Ann Surg* **2017**;265:946–53.

525 6 Zhang F, Ren G, Lu Y, Jin B, Wang J, Chen X, et al. Identification of TRAK1  
526 (Trafficking protein, kinesin-binding 1) as MGB2-Ag: A novel cancer biomarker.  
527 *Cancer Lett* **2009**;274:250–8.

528 7 Yoshii M, Tanaka H, Ohira M, Muguruma K, Iwauchi T, Lee T, et al. Expression of  
529 Forkhead box P3 in tumour cells causes immunoregulatory function of signet ring  
530 cell carcinoma of the stomach. *Br J Cancer* **2012**;106:1668–74.

531 8 Ryu JW, Kim HJ, Lee YS, Myong NH, Hwang CH, Lee GS, et al. The Proteomics  
532 Approach to Find Biomarkers in Gastric Cancer. *J Korean Med Sci* **2003**;18:505–  
533 9.

534 9 Jang JS, Cho HY, Lee YJ, Ha WS, Kim HW. The differential proteome profile of  
535 stomach cancer: Identification of the biomarker candidates. *Oncol Res*  
536 **2004**;14:491–9.

537 10 Li W, Li JF, Qu Y, Chen XH, Qin JM, Gu QL, et al. Comparative proteomics analysis  
538 of human gastric cancer. *World J Gastroenterol* **2008**;14:5657–64.

539 11 Bagnell CR. Laser capture microdissection. *Mol Diagnostics Clin Lab*  
540 **2005**;274:219–24.

541 12 Gillet LC, Navarro P, Tate S, Röst H, Selevsek N, Reiter L, et al. Targeted Data  
542 Extraction of the MS/MS Spectra Generated by Data-independent Acquisition: A  
543 New Concept for Consistent and Accurate Proteome Analysis. *Mol Cell*  
544 *Proteomics* **2012**;11:O111.016717–1–17.

545 13 Rosenberger G, Koh CC, Guo T, Röst HL, Kouvonen P, Collins BC, et al. A  
546 repository of assays to quantify 10,000 human proteins by SWATH-MS. *Sci Data*  
547 **2014**;1:1–15.

548 14 Hanahan D, Weinberg R a. Hallmarks of cancer: the next generation. *Cell*  
549 **2011**;144:646–74.

550 15 Warburg O. On the origin of cancer cells. *Science* **1956**;123:309–14.



- 551 16 Bansil R, Turner BS. Mucin structure, aggregation, physiological functions and  
552 biomedical applications. *Curr Opin Colloid Interface Sci* **2006**;11:164–70.
- 553 17 Turner MW. Mannose-binding lectin: The pluripotent molecule of the innate  
554 immune system. *Immunol Today* **1996**;17:532–40.
- 555 18 Matsushita M, Endo Y, Taira S, Sato Y, Fujita T, Ichikawa N, et al. A novel human  
556 serum lectin with collagen- and fibrinogen-like domains that functions as an  
557 opsonin. *J Biol Chem* **1996**;271:2448–54.
- 558 19 Ozen A, Comrie WA, Ardy RC, Conde CD, Dalgic B, Beser ÖF, et al. CD55  
559 deficiency, early-onset protein-losing enteropathy, and thrombosis. *N Engl J Med*  
560 **2017**;377:52–61.
- 561 20 Sim RB, Day AJ, Moffatt BE, Fontaine M. Complement Factor I and Cofactors in  
562 Control of Complement System Convertase Enzymes. *Methods Enzymol*  
563 **1993**;223:13–35.
- 564 21 Soames CJ, Sim RB. Interactions between human complement components factor  
565 H, factor I and C3b. *Biochem J* **1997**;326:553–61.
- 566 22 Campbell WD, Lazoura E, Okada N, Okada H. Inactivation of C3a and C5a  
567 octapeptides by carboxypeptidase R and carboxypeptidase N. *Microbiol Immunol*  
568 **2002**;46:131–4.
- 569 23 Tschopp J, Chonn A, Hertig S, French LE. Clusterin, the human apolipoprotein and  
570 complement inhibitor, binds to complement C7, C8 $\beta$ , and the b domain of C9. *J*  
571 *Immunol* **1993**;151:2159–65.
- 572 24 Jaccard P. the Distribution of the Flora in the Alpine Zone. *New Phytol* 1912;11:37–  
573 50.
- 574 25 Kam Ho T. Random Decision Forests. *IEEE* **1995**;1:278–82.
- 575 26 Ge S, Xia X, Ding C, Zhen B, Zhou Q, Feng J, et al. A proteomic landscape of  
576 diffuse-type gastric cancer. *Nat Commun* **2018**;9:1–16.
- 577 27 Jothy S, Yuan SY, Shirota K. Transcription of carcinoembryonic antigen in normal  
578 colon and colon carcinoma: In situ hybridization study and implication for a new  
579 in vivo functional model. *Am J Pathol* **1993**;143:250–7.
- 580 28 Kodera Y, Isobe K, Yamauchi M, Satta T, Hasegawa T, Oikawa S, et al. Expression  
581 of carcinoembryonic antigen (CEA) and nonspecific crossreacting antigen (NCA)  
582 in gastrointestinal cancer; the correlation with degree of differentiation. *Br J*  
583 *Cancer* **1993**;68:130–6.
- 584 29 Benchimol S, Fuks A, Jothy S, Beauchemin N, Shirota K, Stanners CP.  
585 Carcinoembryonic antigen, a human tumor marker, functions as an intercellular  
586 adhesion molecule. *Cell* **1989**;57:327–34.
- 587 30 Ilantzis C, Demarte L, Sreaton RA, Stanners CP. Deregulated expression of the  
588 human tumor marker CEA and CEA family member CEACAM6 disrupts tissue  
589 architecture and blocks colonocyte differentiation. *Neoplasia* **2002**;4:151–63.
- 590 31 Eidelman FJ, Fuks A, DeMarte L, Taheri M, Stanners CP. Human carcinoembryonic  
591 antigen, an intercellular adhesion molecule, blocks fusion and differentiation of  
592 rat myoblasts. *J Cell Biol* **1993**;123:467–75.

- 593 32 Ordoñez C, Screaton RA, Ilantzis C, Stanners CP. Human carcinoembryonic antigen  
594 functions as a general inhibitor of anoikis. *Cancer Res* **2000**;60:3419–24.
- 595 33 Zhou J, Fan X, Chen N, Zhou F, Dong J, Nie Y, et al. Identification of CEACAM5  
596 as a Biomarker for Prewarning and Prognosis in Gastric Cancer. *J Histochem*  
597 *Cytochem* **2015**;63:922–30.
- 598 34 Terada T. An immunohistochemical study of primary signet-ring cell carcinoma of  
599 the stomach and colorectum: III. expressions of EMA, CEA, CA19-9, CDX-2, p53,  
600 Ki-67 antigen, TTF-1, vimentin, and p63 in normal mucosa and in 42 cases *Int J*  
601 *Clin Exp Pathol*. **2013**;6:630–8.
- 602 35 Warner JN, Nakamura LY, Pacelli A, Humphreys MR, Castle EP. Primary signet ring  
603 cell carcinoma of the prostate. *Mayo Clin Proc* **2010**;85:1130–6.
- 604 36 Conaghan PJ, Ashraf SQ, Tytherleigh MG, Wilding JL, Tchilian E, Bicknell D, et al.  
605 Targeted killing of colorectal cancer cell lines by a humanised IgG1 monoclonal  
606 antibody that binds to membrane-bound carcinoembryonic antigen. *Br J Cancer*  
607 **2008**;98:1217–25.
- 608 37 Velcich A, Yang WC, Heyer J, Fragale A, Nicholas C, Viani S, et al. Colorectal  
609 cancer in mice genetically deficient in the mucin Muc2. *Science* (80- )  
610 **2002**;295:1726–9.
- 611 38 Van der Sluis M, De Koning BAE, De Bruijn ACJM, Velcich A, Meijerink JPP, Van  
612 Goudoever JB, et al. Muc2-Deficient Mice Spontaneously Develop Colitis,  
613 Indicating That MUC2 Is Critical for Colonic Protection. *Gastroenterology*  
614 **2006**;131:117–29.
- 615 39 Davis CW, Dickey BF. Regulated Airway Goblet Cell Mucin Secretion. *Annu Rev*  
616 *Physiol* **2008**;70:487–512.
- 617 40 Cavalieri D, Dolara P, Mini E, Luceri C, Castagnini C, Toti S, et al. Analysis of gene  
618 expression profiles reveals novel correlations with the clinical course of colorectal  
619 cancer. *Oncol Res* **2007**;16:535–48.
- 620 41 Afshar-Kharghan V. The role of the complement system in cancer. *J Clin Invest*  
621 **2017**;127:780–9.
- 622 42 Chen J, Yang WJ, Sun HJ, Yang X, Wu YZ. C5b-9 staining correlates with clinical  
623 and tumor stage in gastric adenocarcinoma. *Appl Immunohistochem Mol Morphol*  
624 **2016**;24:470–5.
- 625 43 Inoue T, Yamakawa M, Takahashi T. Expression of complement regulating factors  
626 in gastric cancer cells. *J Clin Pathol - Mol Pathol* **2002**;55:193–9.
- 627 44 Wasserfallen JB, Spaeth P, Guillou L, Pécoud AR. Acquired deficiency in C1-  
628 inhibitor associated with signet ring cell gastric adenocarcinoma: A probable  
629 connection of antitumor-associated antibodies, hemolytic anemia, and  
630 complement turnover. *J Allergy Clin Immunol* **1995**;95:124–31.
- 631 45 Kleczko EK, Kwak JW, Schenk EL, Nemenoff RA. Targeting the complement  
632 pathway as a therapeutic strategy in lung cancer. *Front Immunol* **2019**;10:1–16.
- 633

634 **Tables and Figures**

635

**Table 1** Statistics for tissue sample collection and pairing

| <b>Sample feature</b> | <b>SRCC<br/>(n = 14)</b> | <b>PDAC<br/>(n = 17)</b> | <b>(Measure of matching*)</b> | <b>WMDAC<br/>(n = 17)</b> | <b>(Measure of matching*)</b> |
|-----------------------|--------------------------|--------------------------|-------------------------------|---------------------------|-------------------------------|
| <b>Mean age</b>       | 54.79                    | 54.82                    | (0.95)                        | 58.35                     | (0.33)                        |
| <b>Gender</b>         |                          |                          |                               |                           |                               |
| Male                  | 64%                      | 65%                      | (0.98)                        | 71%                       | (0.71)                        |
| Female                | 36%                      | 35%                      | (0.98)                        | 29%                       | (0.71)                        |
| <b>T staging</b>      |                          |                          |                               |                           |                               |
| T1                    | 0%                       | 0%                       | (1)                           | 0%                        | (1)                           |
| T2, T3, T4            | 100%                     | 100%                     | (1)                           | 100%                      | (1)                           |
| <b>N staging</b>      |                          |                          |                               |                           |                               |
| N0                    | 7%                       | 0%                       | (0.26)                        | 6%                        | (0.89)                        |
| N1, N2                | 21%                      | 29%                      | (0.77)                        | 35%                       | (0.4)                         |
| N3                    | 71%                      | 71%                      | (0.96)                        | 59%                       | (0.47)                        |

\* Measure of matching is represented by p value of statistics test. Wilcox test for age, and  $\chi^2$  test for gender T and N staging.

636

637

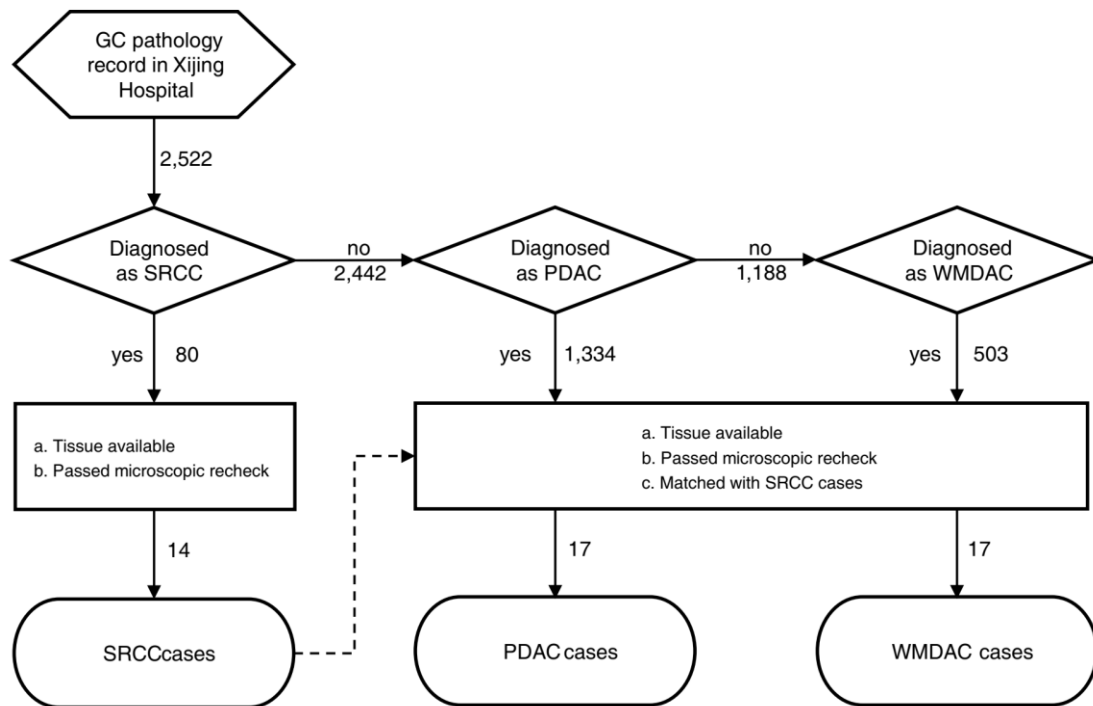

638

639 **Figure 1.** The evaluation procedure to select proper tissue samples of SRCC, PDAC  
640 and WMDAC for the proteomics study using LCM.

641

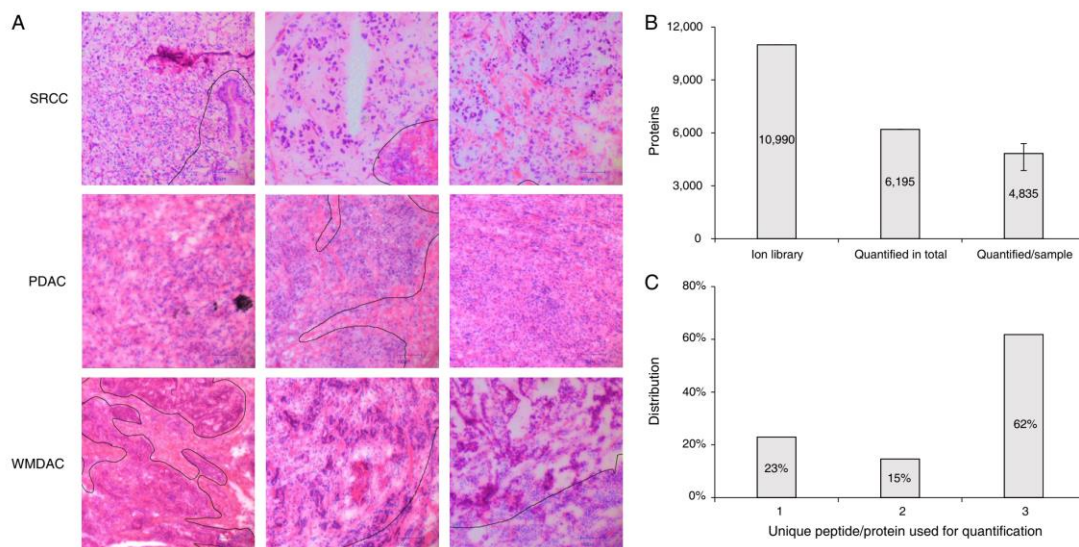

642

643 **Figure 2.** Assessment of data quality. A) The HE images for diagnosis of SRCC, PDAC  
644 and WMDAC. B) The proteins in the gastric tissues identified using DDA and DIA  
645 approach (error bar indicates the upper and lower bound of proteins quantified/sample).  
646 C) Distribution of the unique peptides in the quantified proteins.

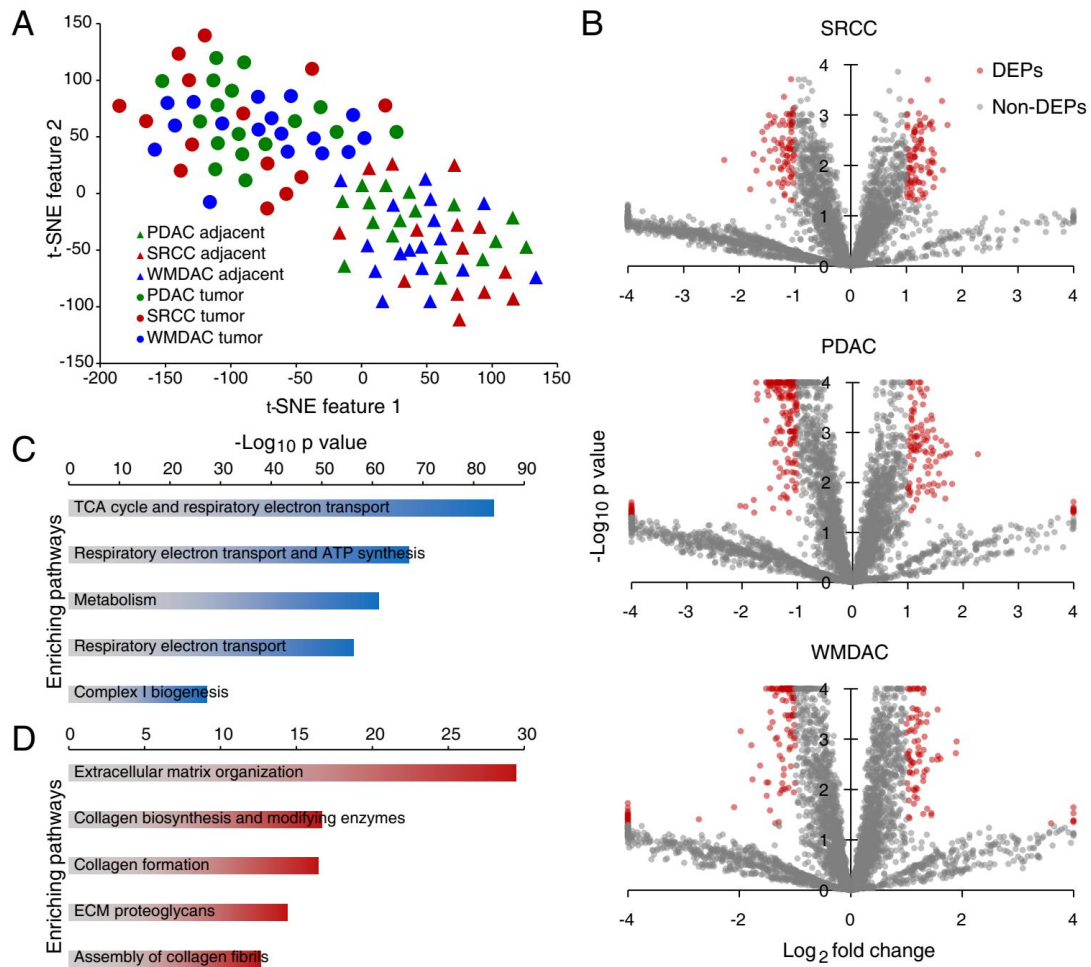

647

648 **Figure 3.** Basic information of the quantitative proteomics in the gastric tissues. A) T-  
649 SNE analysis towards the protein abundance gained from the tumor and adjacent tissues  
650 in the 3 GC subtypes. B) The presence of T/A-DEPs in 3 GC subtypes on volcano plots  
651 based on protein abundance changes and t test. C) and D) The enriched pathways at top  
652 5 for the down regulated and up regulated proteins in all the GC tissues.

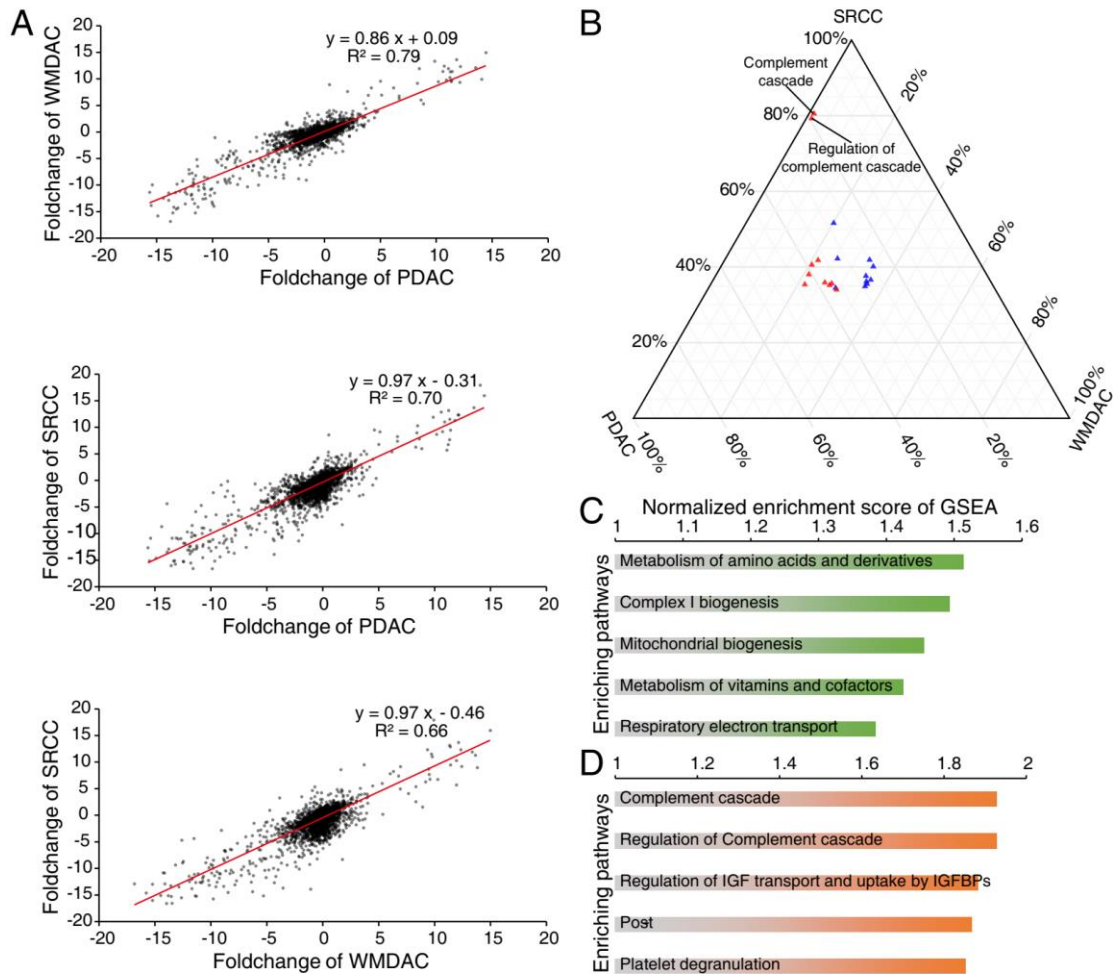

653

654 **Figure 4.** The proteomic characterization of SRCC. A) Linear correlations of the  
 655 protein abundance ratios (T/A) inter-subtypes. B) Ternary plot indicating subtype  
 656 specificities of top 10 pathways enriching upregulated T/A-DEPs (red) and  
 657 downregulated T/A-DEPs (blue). C) and D) The AC-specific and the SRCC-specific  
 658 pathways at top 5 based on GSEA.

659

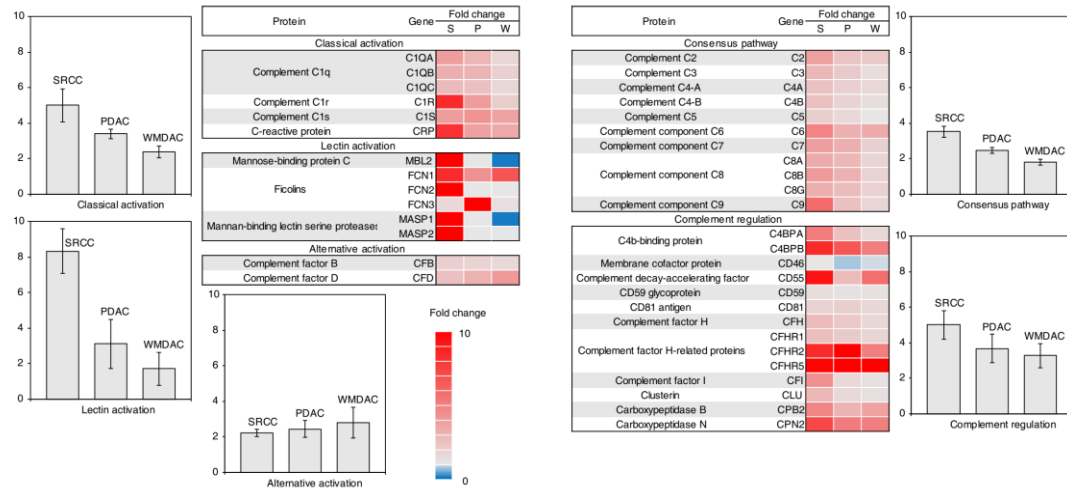

660

661 **Figure 5.** Expressional levels of complement cascade in 3 subtypes. Complement  
 662 related proteins quantified in 3 subtypes of gastric cancer were grouped into 5 segments,  
 663 namely, classical activation, lectin activation, alternative activation, consensus  
 664 pathways and complement regulation. Protein fold changes were indicated by heatmap  
 665 and average fold change for each segment was described in corresponding bar plot.  
 666

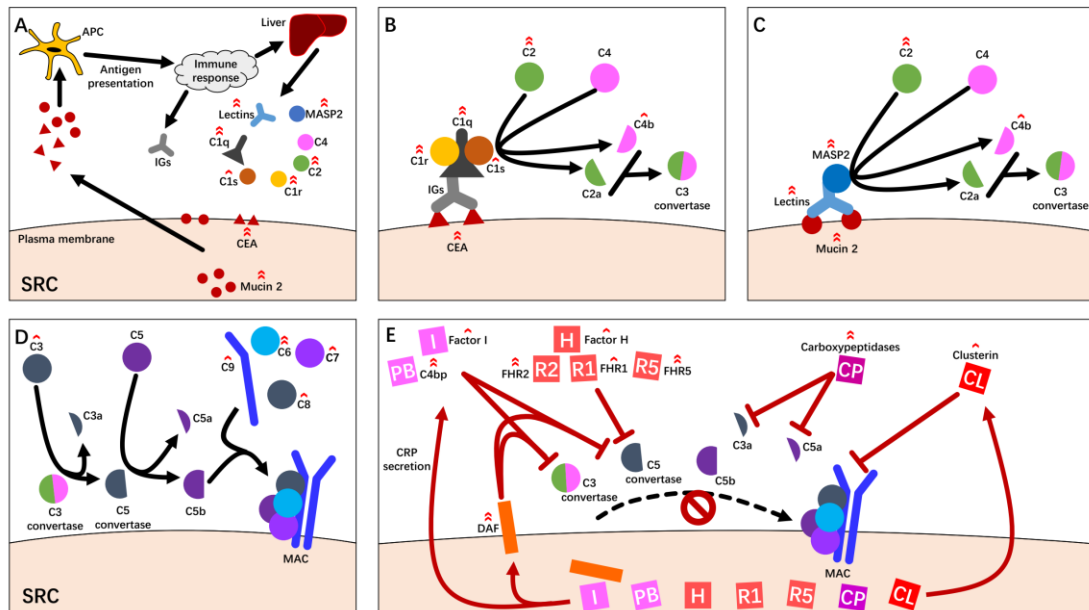

667

668 **Figure 6.** Postulated complement molecular events occurred in SRCC context. Red  
 669 arrow marks indicate upregulation of corresponding molecules, with single mark  
 670 indicating fold change  $> 2$  but  $\leq 4$ , and double marks indicating fold change  $> 4$ . **A.**  
 671 Pre-complement reactions. The signet ring cells (SRC) overexpress mucin 2 and CEA,  
 672 which are captured by antigen presenting cells (APC) in the SRCC microenvironment.  
 673 The dendritic cells present those markers and activate immune response, which produce  
 674 Igs to target SRC, and cytokines to stimulate hepatocytes which in turn express  
 675 complement molecules including lectins, MASP2, C1q, C1s, C1r, C2 to C9 (not  
 676 completely depicted). **B.** Classical activation. Igs bind to SRC antigen like CEA and  
 677 recruit C1q, C1r and C1s to form C1 complexes which cleave C2 and C4. The products  
 678 of this reaction form C3 convertase (C2aC4b complex). **C.** Lectin activation.  
 679 Complement related lectins bind to SRC surface glycoproteins like Mucin 2 and recruit  
 680 MASP2 which functions the same as C1 complex described in **B.** **D.** Consensus  
 681 pathway. C3 convertase cleave C3 into C3a and C5 convertase (C3b). C5 convertase  
 682 cleave C5 into C5a and C5b. C5b recruit C6 to C9 and form MAC. **E.** Complement  
 683 regulation. To survive the complement cascade induced cytotoxicity, SRC express DAF,  
 684 Factor 1 and C4bp to inhibit C3 and C5 convertase, Factor H, FHR1, FHR2 and FHR5  
 685 to inhibit C5 convertase, Carboxypeptidases to inhibit C3a and C5a, and Clusterin to  
 686 abolish MAC.



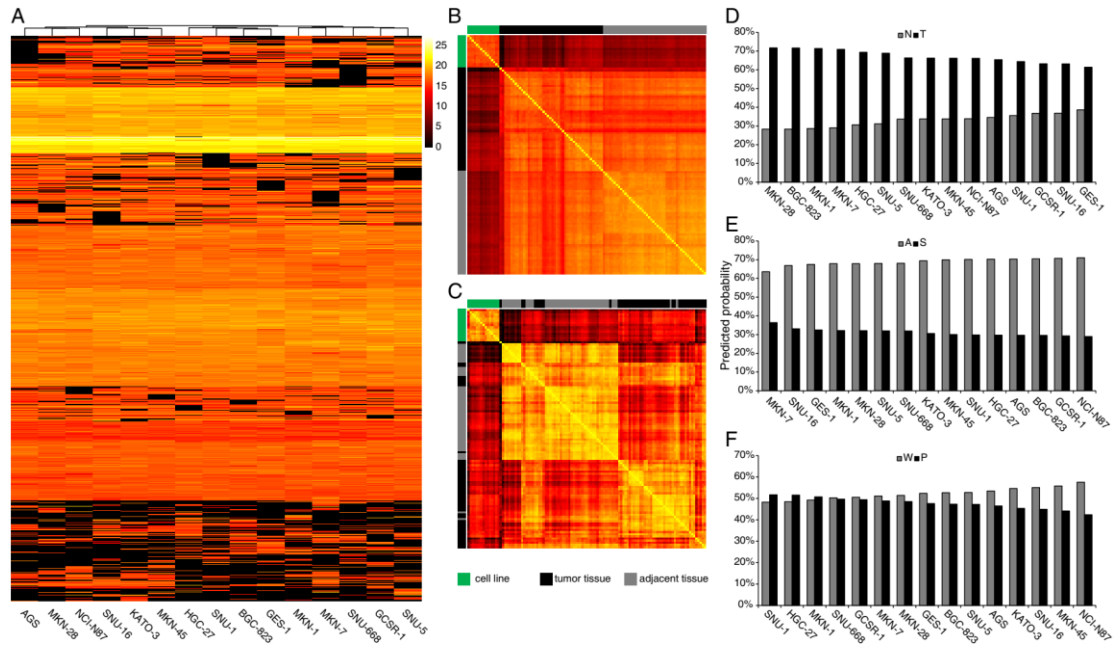

687

688 **Figure 7.** Analysis of the quantitative proteomes in 15 human gastric cell lines. A)  
689 Clustering of the quantified proteins in all the cell lines. B) and C) Parallel abundance  
690 comparison of cell lines and tissues via Jacard index and correlation coefficient. D), E)  
691 and F) Similarity predictions towards GC cell lines and tissues by NT, AS and PW  
692 classifier.
